# Supplementary material for: CEM43°C thermal dose thresholds: a potential guide for magnetic resonance radiofrequency exposure levels?
Source: Springer Nature journal article supplement (doi:10.1007/s00330-013-2825-y), 2013-04-03
Supplement: MOESM1 [file 330_2013_2825_MOESM1_ESM.pdf]

# *Participants of the Thermal Workshop on RF Hotspots*

Zurich, March 21-22, 2011

| <i>Name</i>         | <i>Company</i>                                     | <i>Email</i>                       |
|---------------------|----------------------------------------------------|------------------------------------|
| Andreas Bitz        | Hahn Institute, Germany                            | andreas.bitz@uni-due.de            |
| Benjamin Loader     | National Physical Laboratory (NPL), United Kingdom | benjamin.loader@npl.co.uk          |
| Berina Eppink       | ERASMUS MC, Netherlands                            | b.eppink@erasmusmc.nl              |
| Cecilia Possanzini  | Philips, Netherlands                               | cecilia.possanzini@philips.com     |
| Elizabeth Repasky   | Roswell Park Cancer Institute, United States       | Elizabeth.Repasky@RoswellPark.org  |
| Esra Neufeld        | IT'IS Foundation, Switzerland                      | neufeld@itis.ethz.ch               |
| Georg Frese         | Siemens, Germany                                   | georg.frese@siemens.com            |
| Gerard van Rhooen   | ERASMUS MC, Netherlands                            | g.c.vanrhoon@erasmusmc.nl          |
| Heinrich Walt       | University Hospital Zürich, Switzerland            | Heinrich.Walt@usz.ch               |
| Hugo Kroeze         | Utrecht University Hospital, Netherlands           | H.Kroeze@umcutrecht.nl             |
| Jacek Nadobny       | Charité Berlin, Germany                            | jacek.nadobny@charite.de           |
| Jan Paska           | IBT, ETH Zürich, Switzerland                       | paska@ifh.ee.ethz.ch               |
| Janet De Wilde      | Edinburgh, United Kingdom                          | janet_dewilde@btinternet.com       |
| Joe Roti Roti       | Washington University, St. Louis, United States    | jrotiroti@radonc.wustl.edu         |
| Johan van den Brink | Philips, Netherlands                               | johan.van.den.brink@philips.com    |
| Manuel Murbach      | IT'IS Foundation, Switzerland                      | murbach@itis.ethz.ch               |
| Marvin Ziskin       | Temple University, United States                   | ziskin@astro.temple.edu            |
| Matthias Gebhardt   | Siemens, Germany                                   | matthias.gebhardt@siemens.com      |
| Maximilian Fütterer | ZMT, Switzerland                                   | fuetterer@zurichmedtech.com        |
| Michael Oberle      | ZMT, Switzerland                                   | oberle@zurichmedtech.com           |
| Michael Steckner    | Toshiba, United States                             | msteckner@tmriusa.com              |
| Mike Horseman       | Aarhus University, Denmark                         | MIKE@ONCOLOGY.DK                   |
| Nadine Grädel       | EPFL, Switzerland                                  | nadine.graedel@epfl.ch             |
| Niels Kuster        | IT'IS Foundation, Switzerland                      | kuster@itis.ethz.ch                |
| Oliver Kraff        | Hahn Institute, Germany                            | oliver.kraff@uni-duisburg-essen.de |
| Raphael Lee         | University of Chicago, United States               | rlee@surgery.bsd.uchicago.edu      |
| Roger Luechinger    | IBT, ETH Zürich, Switzerland                       | luechinger@biomed.ee.ethz.ch       |
| Theo Samaras        | RCL, Greece                                        | theosama@auth.gr                   |
| Willem Leow         | Speag, Switzerland                                 | louw@speag.com                     |
| Wolfgang Kainz      | FDA, United States                                 | Wolfgang.Kainz@fda.hhs.gov         |
